# Supplementary material for: Galacto-oligosaccharides alleviate experimental lactose intolerance associated with gut microbiota in mice
Source: Frontiers journal article supplement (doi:10.3389/fmicb.2025.1530156), 2025-03-25

## DESCRIPTION

TestDiet® AIN-93G Growth Purified Diet is the growth diet for rodents recommended by the American Institute of Nutrition. It is formulated to substitute for the previous version (AIN-76A) to improve animal performance.

Storage conditions are particularly critical to TestDiet® products, due to the absence of antioxidants or preservative agents. To provide maximum protection against possible changes during storage, store in a dry, cool location. Storage under refrigeration (2° C) is recommended. If long term studies are involved, store the diet at -20° C or colder. Be certain to keep in air tight containers.

| Product Forms Available* | Catalog # |
|--------------------------|-----------|
| 1/2" Pellet              | 7597      |
| 1/2" Pellet, Irradiated  | 1810393   |
| Meal                     | 1810538   |
| Meal, Irradiated         | 1810539   |

\*Other Forms Available By Request

## TYPICAL ANALYSIS

|                           |              |
|---------------------------|--------------|
| Protein.....              | 18.7%        |
| Fat.....                  | 7.0%         |
| Fiber.....                | 5.0%         |
| Carbohydrate.....         | 64.7%        |
| Metabolizable Energy..... | 3.97 kcal/gm |

## INGREDIENTS (%)

|                       |         |
|-----------------------|---------|
| Corn Starch           | 39.7486 |
| Casein - Vitamin Free | 20.0000 |
| Maltodextrin          | 13.2000 |
| Sucrose               | 10.0000 |
| Soybean Oil           | 7.0000  |
| Powdered Cellulose    | 5.0000  |
| AIN 93G Mineral Mix   | 3.5000  |
| AIN 93 Vitamin Mix    | 1.0000  |
| L-Cystine             | 0.3000  |
| Choline Bitartrate    | 0.2500  |
| t-Butylhydroquinone   | 0.0014  |

## FEEDING DIRECTIONS

Feed ad libitum to mice and rats. Plenty of fresh, clean water should be available at all times.

### CAUTION:

Perishable, upon receipt store in a cool dry place, refrigeration recommended.

For laboratory animal experimental use only, NOT for human consumption.

8/12/2010

## NUTRITIONAL PROFILE <sup>1</sup>

### Protein, %

|                  |      |
|------------------|------|
| Arginine, %      | 0.70 |
| Histidine, %     | 0.52 |
| Isoleucine, %    | 0.96 |
| Leucine, %       | 1.73 |
| Lysine, %        | 1.45 |
| Methionine, %    | 0.52 |
| Cystine, %       | 0.37 |
| Phenylalanine, % | 0.96 |
| Tyrosine, %      | 1.01 |
| Threonine, %     | 0.77 |
| Tryptophan, %    | 0.22 |
| Valine, %        | 1.14 |
| Alanine, %       | 0.55 |
| Aspartic Acid, % | 1.29 |
| Glutamic Acid, % | 4.08 |
| Glycine, %       | 0.39 |
| Proline, %       | 2.36 |
| Serine, %        | 1.10 |
| Taurine, %       | 0.00 |

### Fat, %

|                                      |      |
|--------------------------------------|------|
| Cholesterol, ppm                     | 0    |
| Linoleic Acid, %                     | 3.58 |
| Linolenic Acid, %                    | 0.55 |
| Arachidonic Acid, %                  | 0.00 |
| Omega-3 Fatty Acids, %               | 0.55 |
| Total Saturated Fatty Acids, %       | 1.05 |
| Total Monounsaturated Fatty Acids, % | 1.54 |
| Polyunsaturated Fatty Acids, %       | 3.78 |

### Fiber (max), %

### Carbohydrates, %

### Energy (kcal/g) <sup>2</sup>

| From:               | kcal  | %    |
|---------------------|-------|------|
| Protein             | 0.731 | 18.8 |
| Fat (ether extract) | 0.637 | 16.4 |
| Carbohydrates       | 2.528 | 65.1 |

### 18.3

### Minerals

|                 |      |
|-----------------|------|
| Calcium, %      | 0.51 |
| Phosphorus, %   | 0.32 |
| Potassium, %    | 0.36 |
| Magnesium, %    | 0.05 |
| Sodium, %       | 0.13 |
| Chlorine, %     | 0.22 |
| Fluorine, ppm   | 1.0  |
| Iron, ppm       | 39   |
| Zinc, ppm       | 35   |
| Manganese, ppm  | 11   |
| Copper, ppm     | 6.0  |
| Cobalt, ppm     | 0.0  |
| Iodine, ppm     | 0.21 |
| Chromium, ppm   | 1.0  |
| Molybdenum, ppm | 0.14 |
| Selenium, ppm   | 0.24 |

### Vitamins

|                               |       |
|-------------------------------|-------|
| Vitamin A, IU/g               | 4.0   |
| Vitamin D-3 (added), IU/g     | 1.0   |
| Vitamin E, IU/kg              | 81.6  |
| Vitamin K (as menadione), ppm | 0.29  |
| Thiamin Hydrochloride, ppm    | 6.1   |
| Riboflavin, ppm               | 6.7   |
| Niacin, ppm                   | 30    |
| Pantothenic Acid, ppm         | 16    |
| Folic Acid, ppm               | 2.1   |
| Pyridoxine, ppm               | 5.8   |
| Biotin, ppm                   | 0.2   |
| Vitamin B-12, mcg/kg          | 29    |
| Choline Chloride, ppm         | 1,250 |
| Ascorbic Acid, ppm            | 0.0   |

1. Formulation based on calculated values from the latest ingredient analysis information. Since nutrient composition of natural ingredients varies and some nutrient loss will occur due to manufacturing processes, analysis will differ accordingly. Nutrients expressed as percent of ration on an As Fed basis except where otherwise indicated.  
2. Energy (kcal/gm) - Sum of decimal fractions of protein, fat and carbohydrate x 4,9,4 kcal/gm respectively.

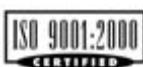

Supplement: Data_Sheet_1.pdf [file Data_Sheet_1.pdf]
